# Supplementary material for: Effective removal and selective capture of copper from salty solution in flow electrode capacitive deionization
Source: Royal Society of Chemistry journal article supplement (doi:10.1039/c9ew00467j), 2019-07-22
Supplement: c9ew00467j1.pdf [file c9ew00467j1.pdf]

Supplementary Material

for

**Effective removal and selective capture of copper from salty solution in flow  
electrode capacitive deionization**

**Author names:**

Xudong Zhang, Fan Yang, Junjun Ma, Peng Liang\*

**Author affiliations:**

State Key Joint Laboratory of Environment Simulation and Pollution Control, School  
of Environment, Tsinghua University, Beijing 100084, P. R. China

**\* Corresponding author:**

Tel.: + 86 10 62796790;

Fax: + 86 10 62771472;

E-mail address: [liangpeng@tsinghua.edu.cn](mailto:liangpeng@tsinghua.edu.cn)

Number of pages: 8

Number of figures: 7

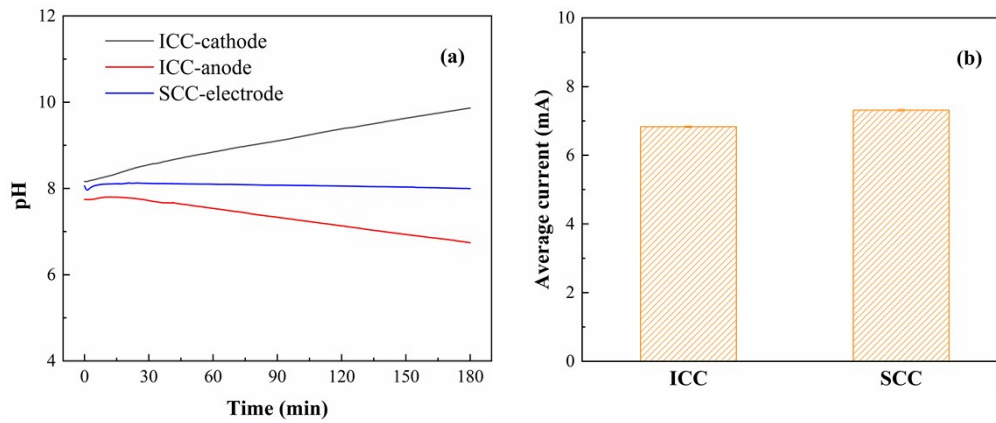

**Figure S1. (a) pH fluctuation of flow electrode and (b) Current of FCDI device in ICC and SCC mode (2.4 V, initial pH of 8.0).**

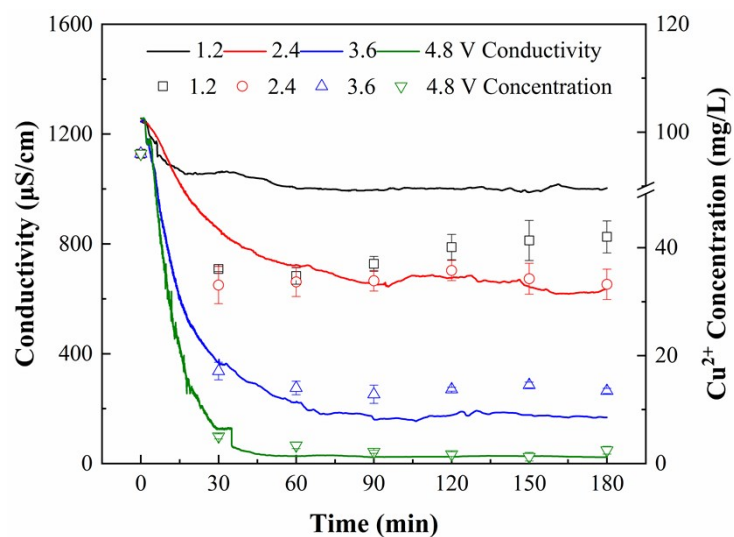

**Figure S2. Conductivity and Cu<sup>2+</sup> concentrations of the effluent at applied voltage of 1.2, 2.4, 3.6 and 4.8 V (SCC mode, initial pH of 8.0).**

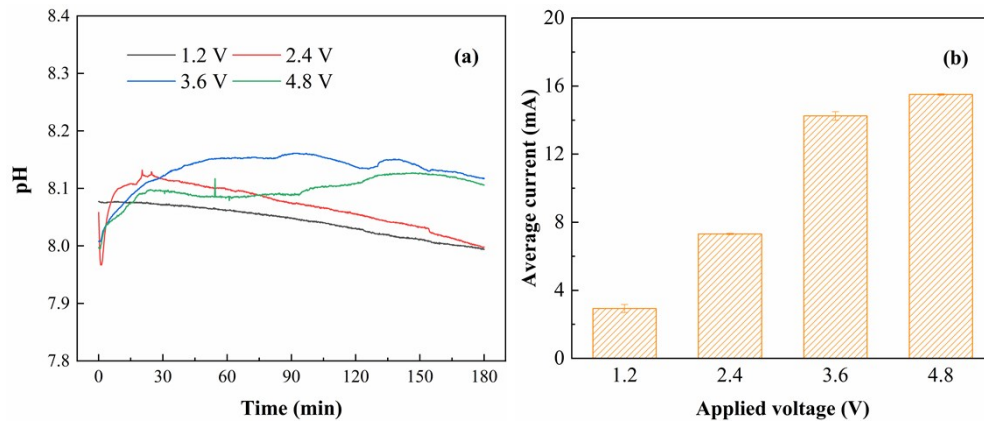

**Figure S3. (a) pH fluctuation of flow electrode and (b) Current of FCDI device at applied voltage of 1.2 V, 2.4, 3.6 and 4.8 V (SCC mode, initial pH of 8.0).**

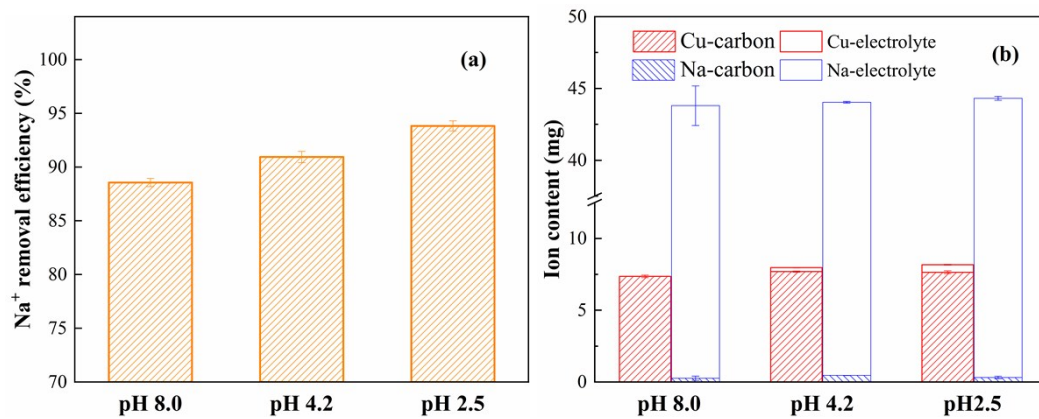

**Figure S4. (a) Na<sup>+</sup> removal efficiency of the influent and (b) ion content of Cu, Na in the carbon particles and in the electrolyte with initial pH of 2.5, 4.2, 8.0 (SCC mode, 3.6 V).**

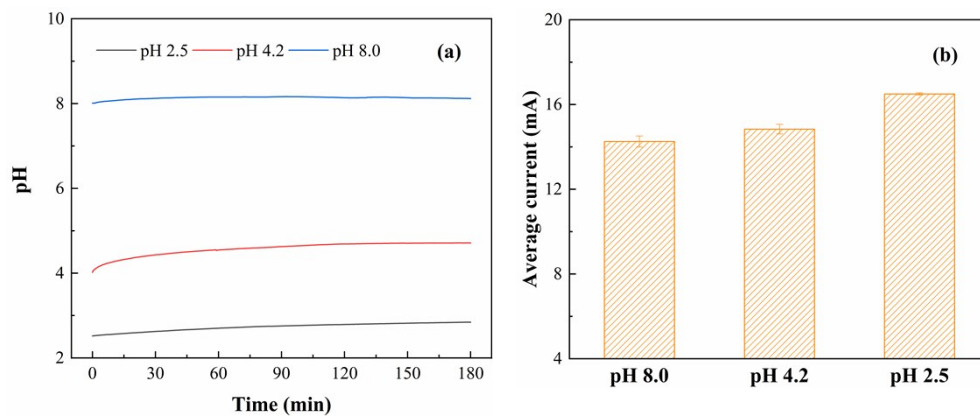

**Figure S5. (a) pH fluctuation of flow electrode and (b) Current of FCDI device with initial pH of 2.5, 4.2, 8.0 (SCC mode, 3.6 V).**

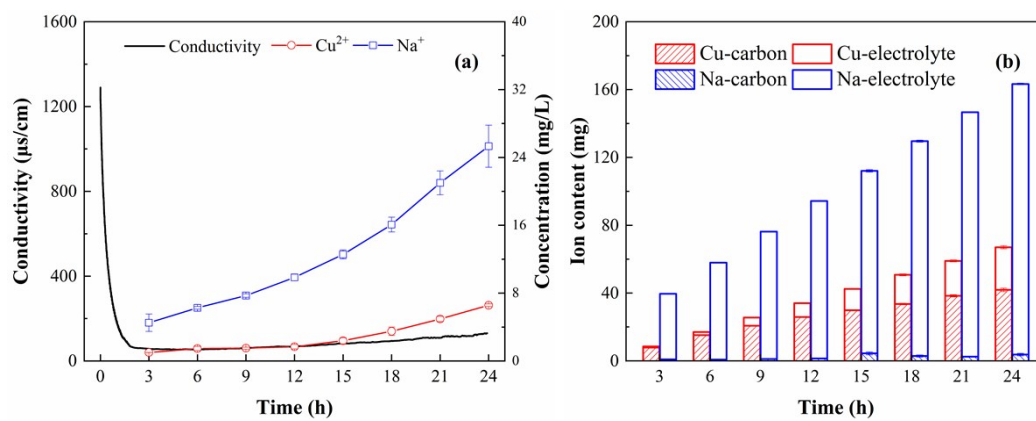

**Figure S6. Time-course variation in (a) conductivity,  $\text{Cu}^{2+}$  and  $\text{Na}^+$  concentrations of the effluent and (b) content of Cu, Na in the activated carbon and in the electrolyte (SCC mode, 3.6 V, initial pH of 2.5).**

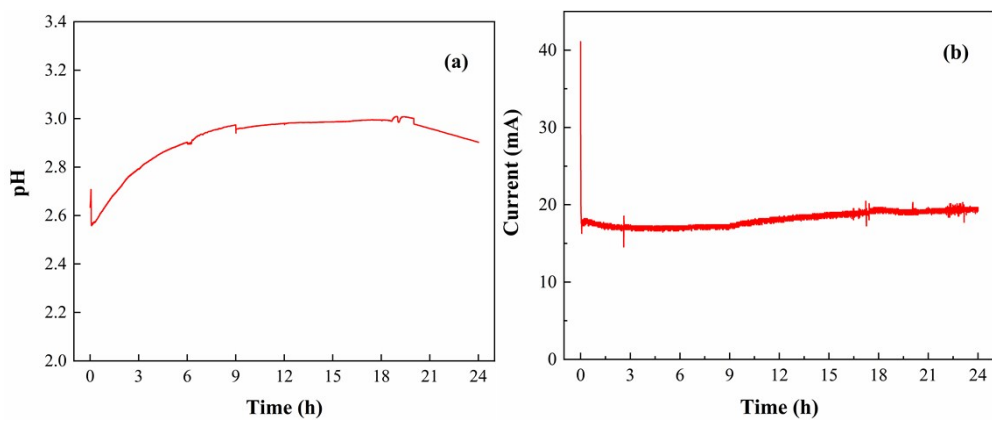

**Figure S7. Time-course variation in (a) pH fluctuation of flow electrode and (b) Current of FCDI device (SCC mode, 3.6 V, initial pH of 2.5).**
